# Supplementary material for: Identification of Non-Volatile Compounds That Impact Flavor Disliking of Whole Wheat Bread Made with Aged Flours
Source: MDPI journal article supplement (doi:10.3390/molecules27041331), 2022-02-16
Supplement: s1 [file s1]

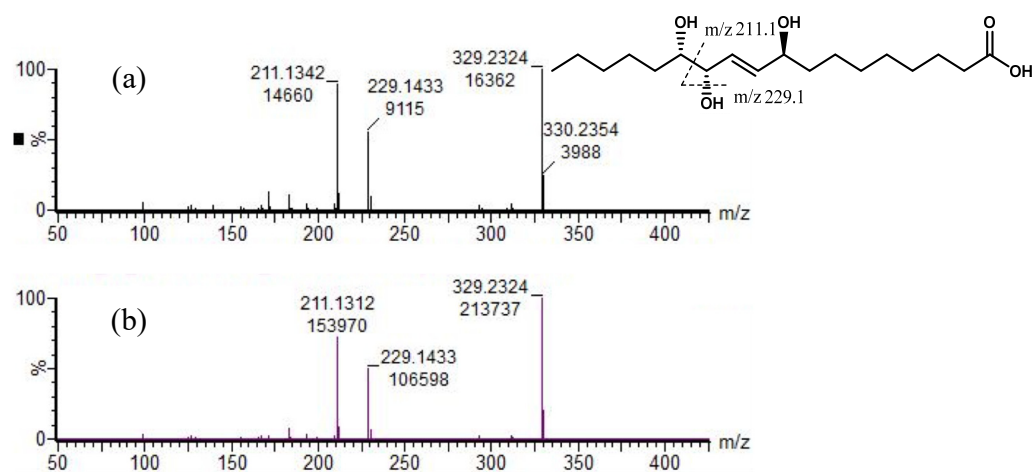

**Figure S1.** LC/QTOF-MS (ESI<sup>-</sup>) fragmentation pattern of pinellic acid from (a) bread and (b) pure standard.

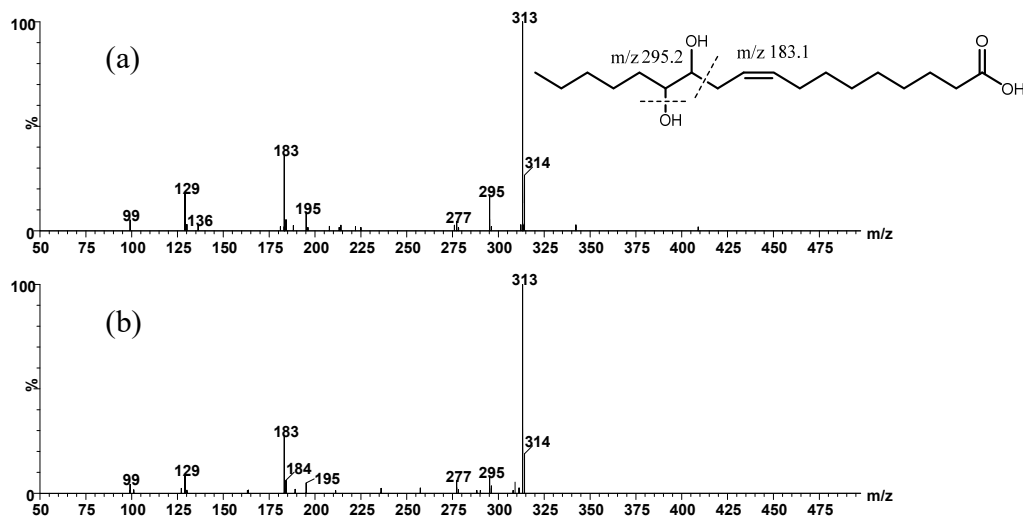

**Figure S2.** LC/QTOF-MS (ESI<sup>-</sup>) fragmentation pattern of 12,13-dihydroxy-9(Z)-octadecenoic acid from (a) bread and (b) pure standard.

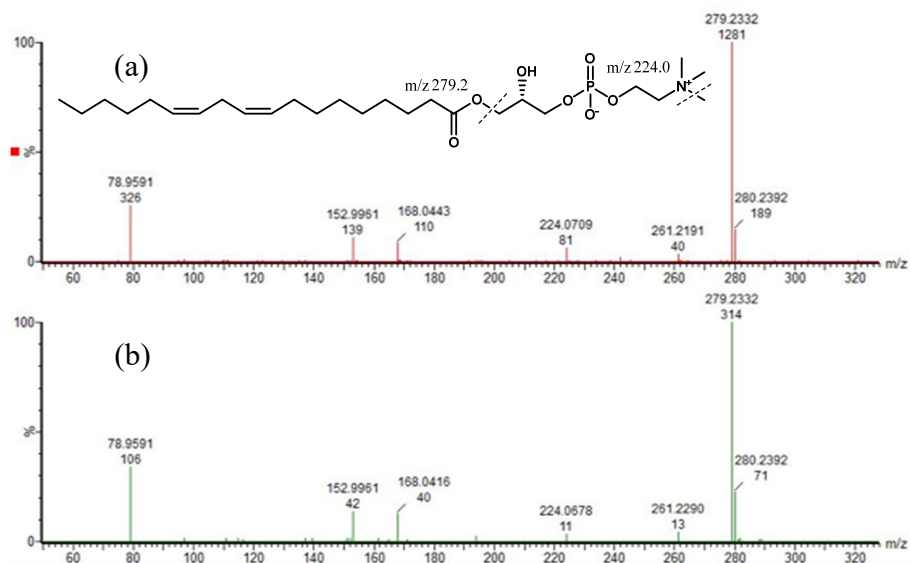

**Figure S3.** LC/QTOF-MS (ESI<sup>-</sup>) fragmentation pattern of 1-(9Z,12Z-octadecadienoyl)-sn-glycero-3-phosphocholine from (a) bread and (b) pure standard.

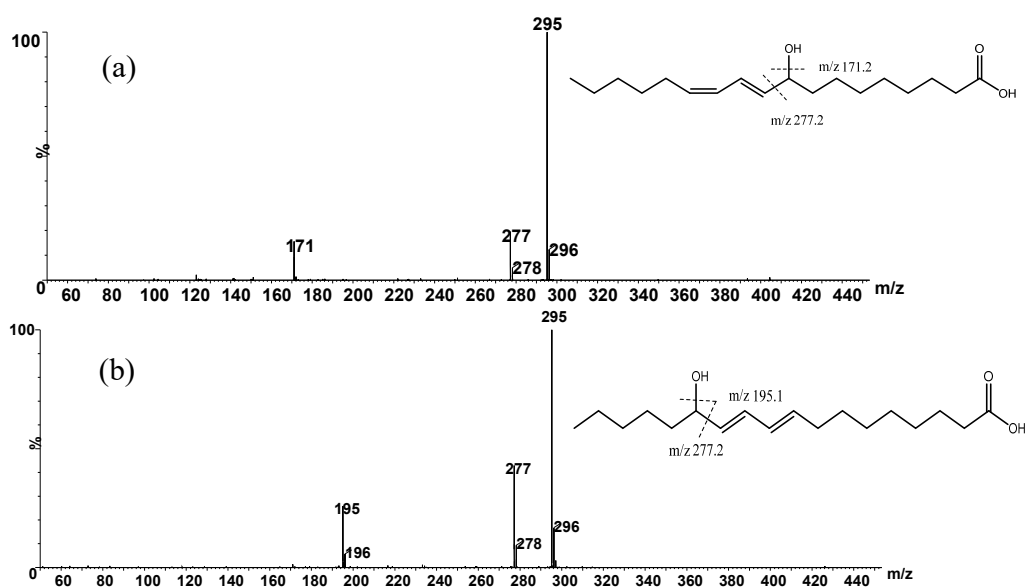

**Figure S4.** LC/QTOF-MS (ESI<sup>-</sup>) fragmentation pattern of 10(E),12(Z)-9-hydroxyoctadecadienoic acid (a) and 9(E),11(E)-13-hydroxyoctadecadienoic acid (b).

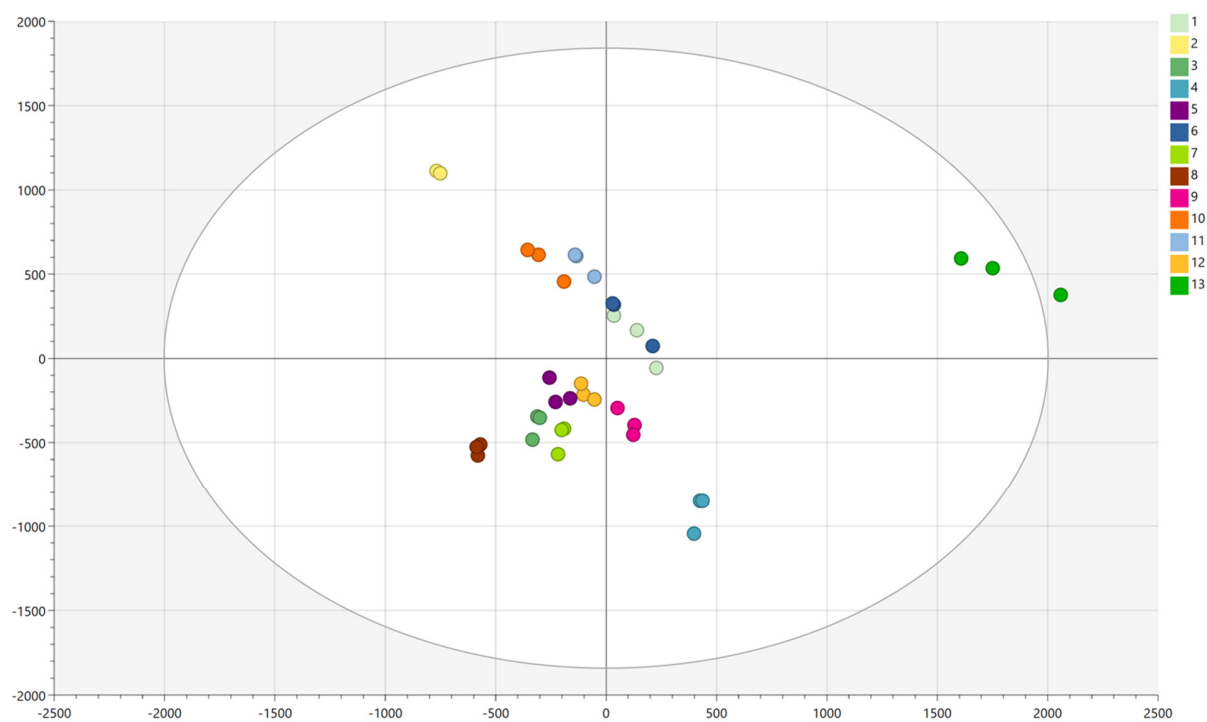

**Figure S5.** Scores scatter plot of PCA model (Pareto scaling) for LC/MS chemical profiling data ( $n = 791$ ) from thirteen whole wheat bread samples in triplicate. Colored by sample.
